# Supplementary material for: Inhibition of Glucose Uptake Blocks Proliferation but Not Cytotoxic Activity of NK Cells
Source: MDPI journal article supplement (doi:10.3390/cells11213489), 2022-11-03
Supplement: s1 [file s1]

Supplementary Materials

# Inhibition of Glucose Uptake Blocks Proliferation but Not Cytotoxic Activity of NK Cells

Lea Katharina Picard <sup>1</sup>, Elisabeth Littwitz-Salomon <sup>2</sup>, Herbert Waldmann <sup>3,4</sup> and Carsten Watzl <sup>1,\*</sup>

<sup>1</sup> Department for Immunology, Leibniz Research Centre for Working Environment and Human Factors at TU Dortmund (IfADo), D-44139 Dortmund, Germany

<sup>2</sup> Institute for Virology, University Hospital Essen, D-45147 Essen, Germany

<sup>3</sup> Max Planck Institute of Molecular Physiology, D-44227 Dortmund, Germany

<sup>4</sup> Chemical Biology, Faculty of Chemistry, Technical University Dortmund, D-44227 Dortmund, Germany

\* Correspondence: watzl@ifado.de

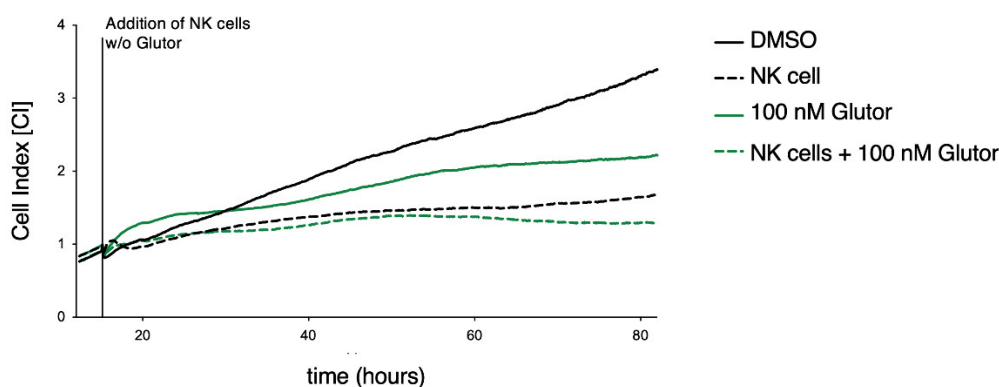

**Figure S1. Impedance-based analysis of MCF7 cells.** Representative graph of the impedance-based analysis of MCF7 cells in the presence or absence of 0.185x10<sup>4</sup> NK cells, 100 nM Glutor or 0.185x10<sup>4</sup> NK cells + 100 nM Glutor.

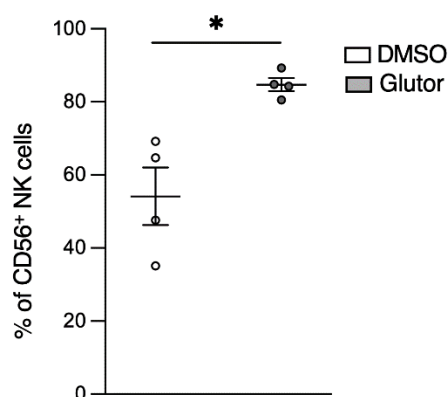

**Figure S2. Enhanced GLUT-1 expression on NK cells after long-term treatment with Glutor.** Expression level of GLUT-1 was analyzed on day 21 of long-term treated NK cells (100 nM Glutor or 0.1% DMSO). n=4. Data were pooled from two independent experiments each experiment was performed with two donors. Statistics: paired t-test. Statistics: paired t-test. significant differences are indicated by asterisk \* $P \leq 0.05$ , \*\* $P \leq 0.01$ , \*\*\* $P \leq 0.001$ , \*\*\*\* $P \leq 0.0001$ .

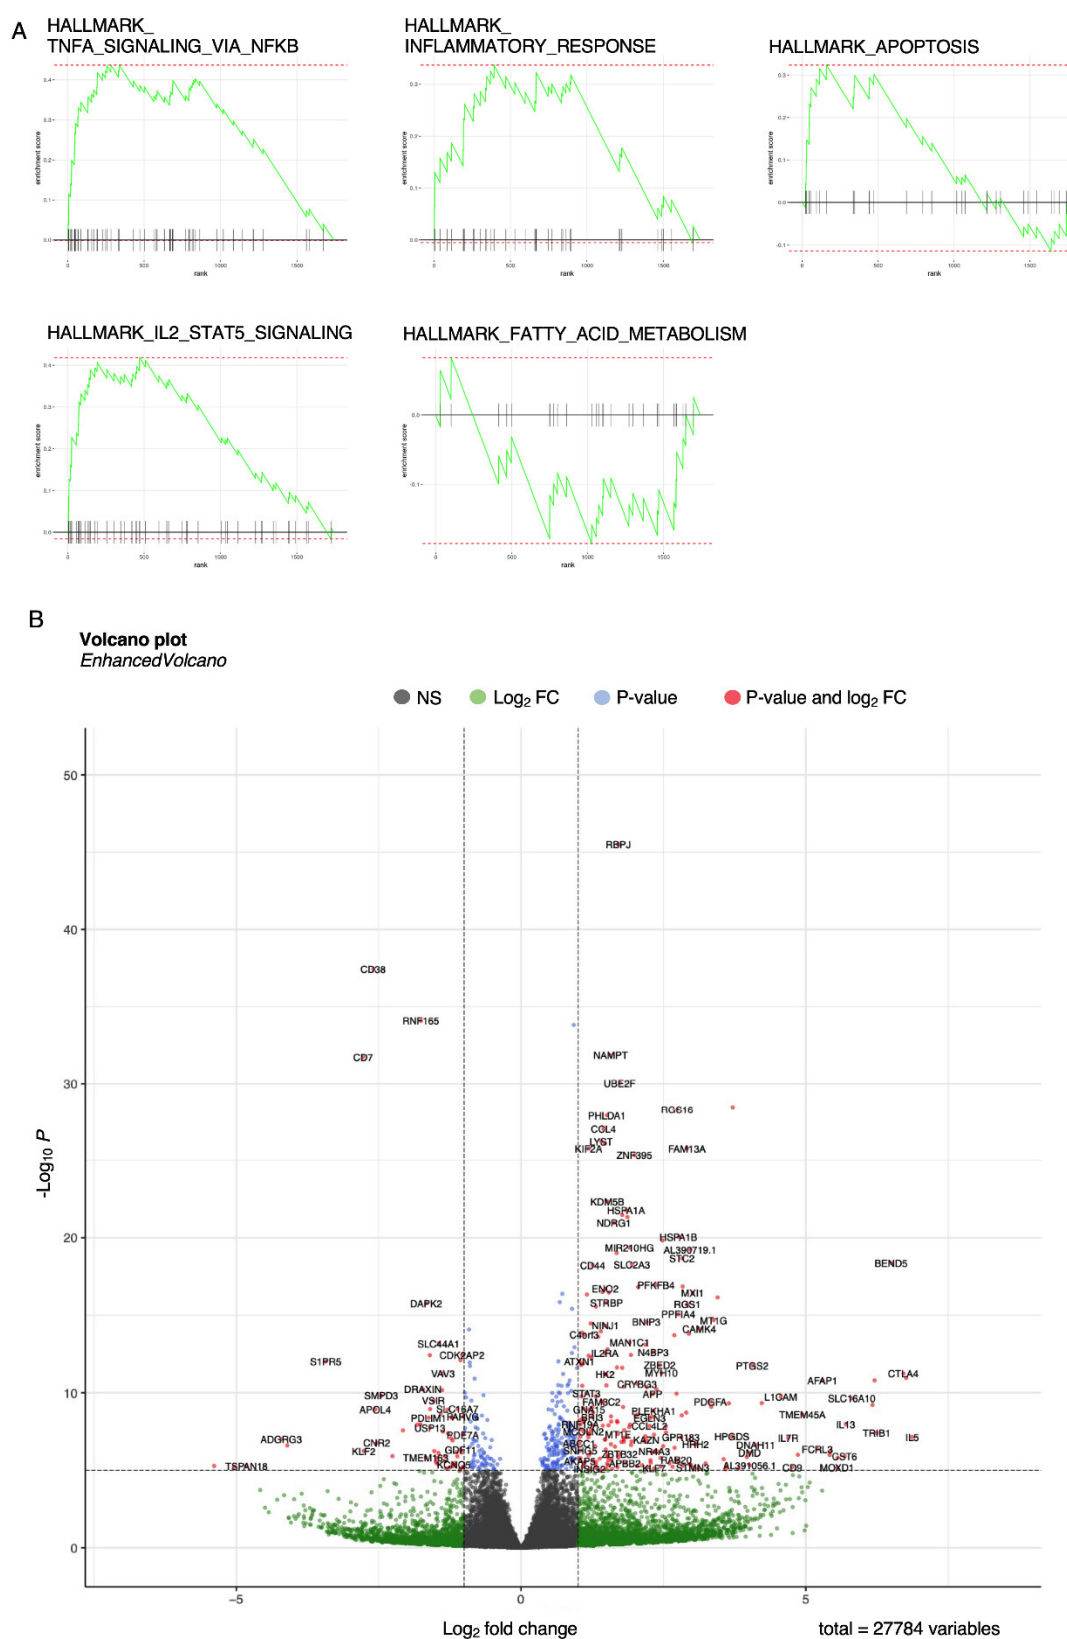

**Figure S3. RNA sequencing results.** A) GSEA of long-term treated NK cells. Hallmark apoptosis, hallmark fatty acid metabolism, hallmark inflammatory response, hallmark IL2 STAT5 signaling, hallmark TNF- $\alpha$  signaling via NF $\kappa$ B n=6. B) Volcano plot displaying differences in relative gene expression after long-term treatment with Glut. Plot represents the  $-\log_{10}$  of the p-value against log<sub>2</sub> fold change. Grey dots: non-significant; green dots: log<sub>2</sub> fold change significant; blue dots: p-value significant; red dots: p-value and log<sub>2</sub> fold change significant. n=6

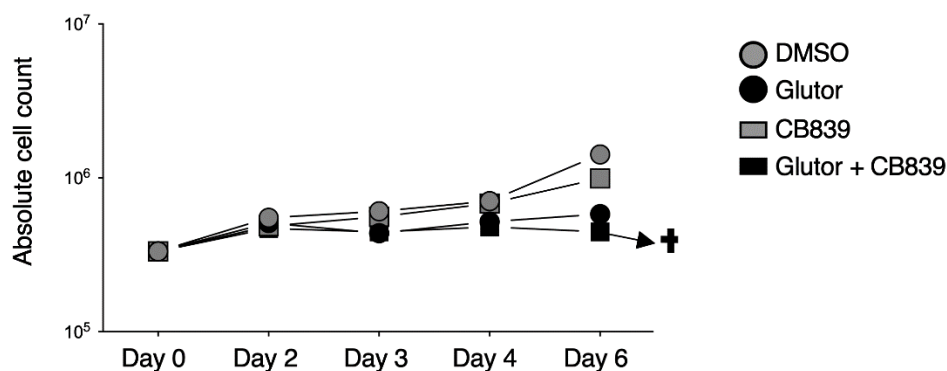

**Figure S4. Inhibition of Glutaminase and glucose transporters results in cell death of NK cells.** Proliferation of Glutor-treated (100 nM), Glutaminase inhibitor (CB839)-treated (0,5  $\mu$ M) or CB839 + Glutor-treated NK cells in comparison to control (DMSO)-treated NK cells. Absolute cell count was calculated at indicated time points.  $n=4$ . At day 6 no living cells could be recovered from the Glutor+CB839 treated sample (indicated by †). Data were pooled from three independent experiments each experiment was performed with one or two donors.
